# Supplementary material for: Selective Extraction of Nonfullerene Acceptors from Bulk-Heterojunction Layer in Organic Solar Cells for Detailed Analysis of Microstructure
Source: MDPI journal article supplement (doi:10.3390/ma14092107), 2021-04-21
Supplement: s1 [file s1]

# Selective Extraction of Nonfullerene Acceptors from Bulk-Heterojunction Layer in Organic Solar Cells for Detailed Analysis of Microstructure

## S1. Peeling-off of Sealing Film/Au/PEDOT:PSS from the OSC Devices

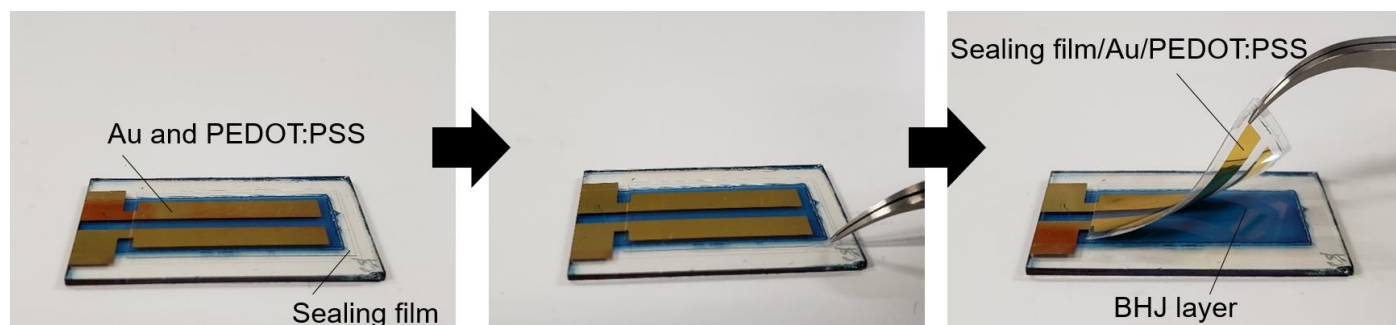

Figure S1. Peeling-off of Sealing film/Au/PEDOT:PSS from the OSC devices.

## S2. Outline for Estimating Grain/Pore Size from AFM Images

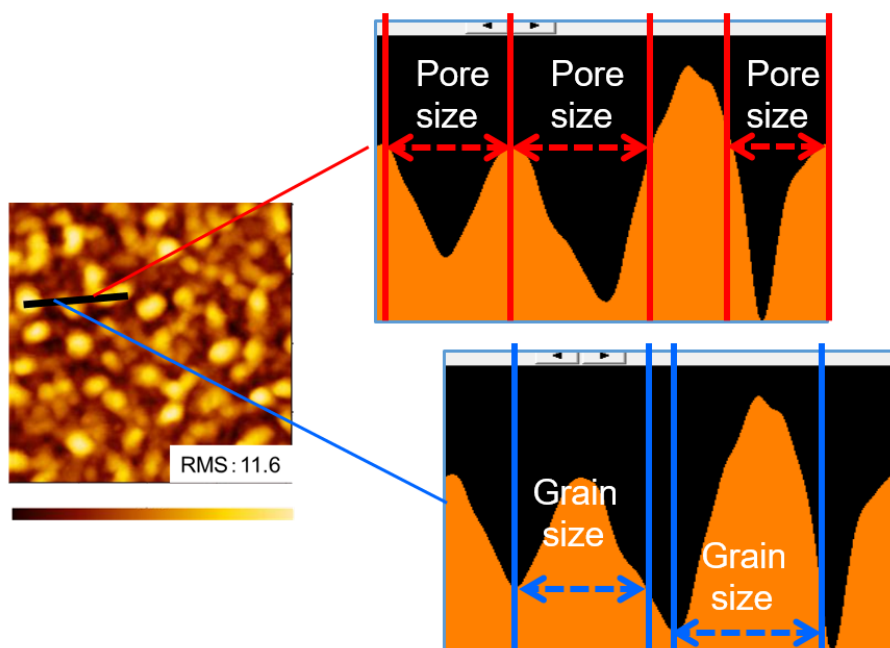

Figure S2. Outline for estimating grain/pore size from AFM images of an acceptor-extracted blend film.

### S3. AFM Images of Thin Films of PTB7 and PBDB-T before and after BGE Washing

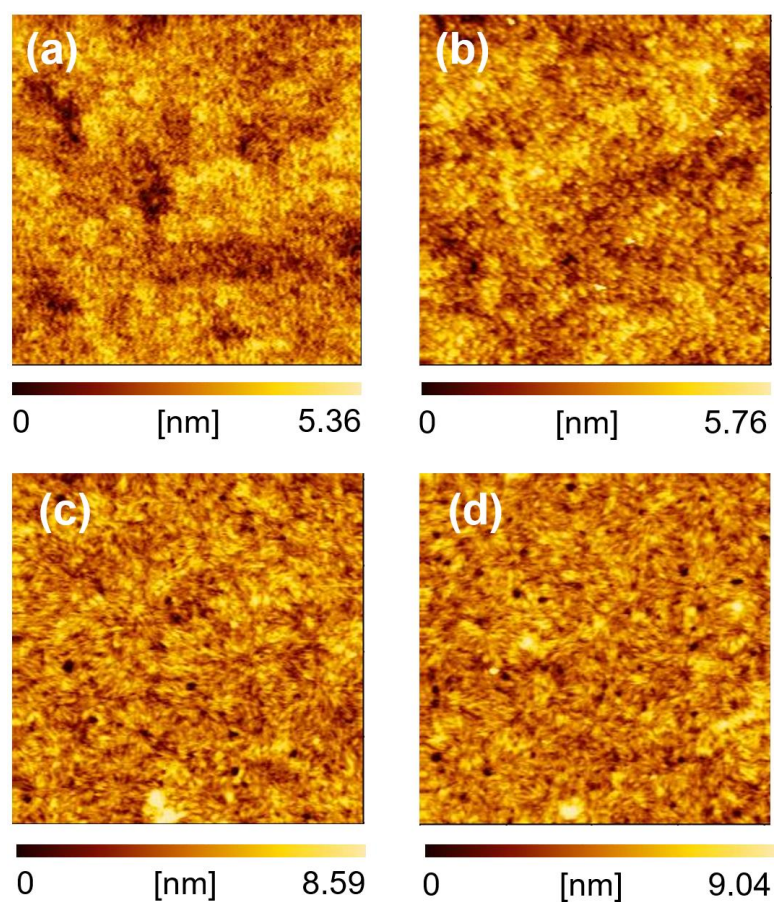

**Figure S3.** AFM images ( $2\ \mu\text{m} \times 2\ \mu\text{m}$ ) of thin films of PTB7 before (a) and after (b) BGE washing and of thin films of PBDB-T before (c) and after (d) BGE washing.

### S4. Absorption and XPS Spectra of Blend Films of ITIC and PTB7 before and after Extraction

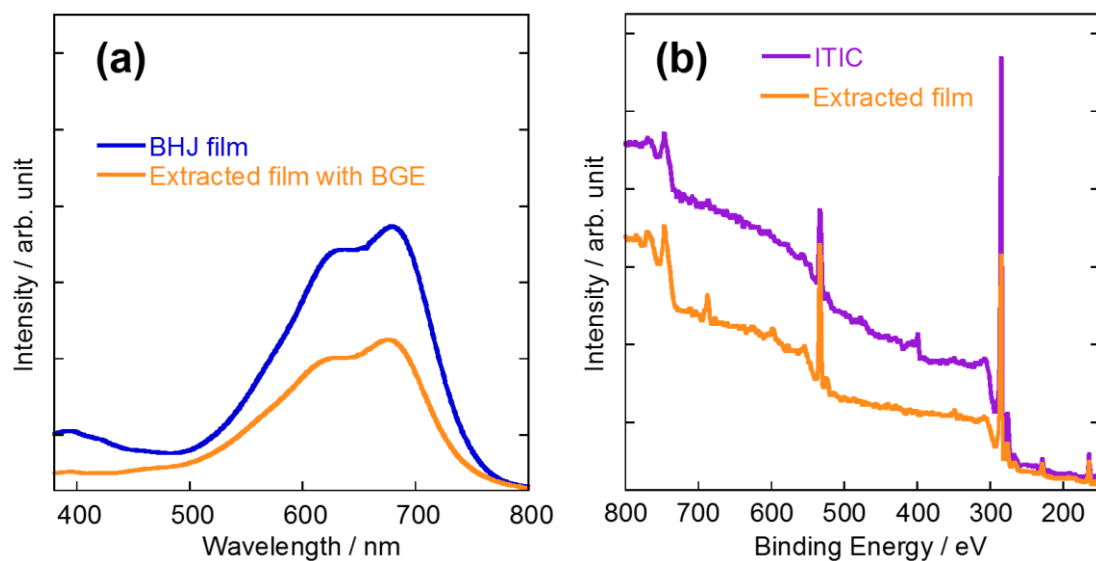

**Figure S4.** Absorption spectra of blend films of ITIC and PTB7 before and after extraction with BGE (a), and XPS spectra of ITIC film and blend film extracted with BGE (b).

## S5. Photovoltaic Properties of OSCs Based on PTB7:EH-IDTBR and PTB7:ITIC

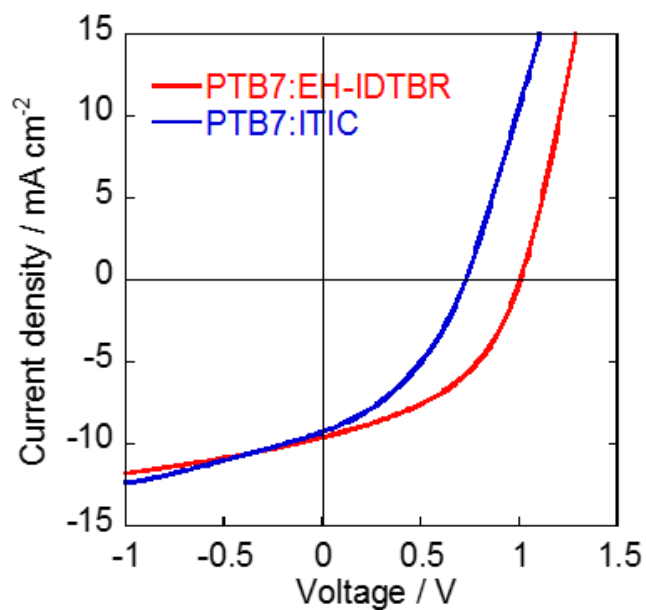

**Figure S5.** *J*-*V* characteristics of PTB7:EH-IDTBR-based OSC and the PTB7:ITIC-based OSC ( $D/(D + A) = 0.50$ ).

**Table S1.** Summarized photovoltaic properties of OSCs based on PTB7:EH-IDTBR and PTB7:ITIC ( $D/(D + A) = 0.50$ ).

| acceptor | $J_{SC} / \text{mA cm}^{-2}$ | $V_{OC} / \text{V}$ | FF                 | PCE / %            |
|----------|------------------------------|---------------------|--------------------|--------------------|
| EH-IDTBR | 9.37( $\pm 0.25$ )           | 1.00( $\pm 0.01$ )  | 0.43( $\pm 0.01$ ) | 4.00( $\pm 0.20$ ) |
| ITIC     | 9.13( $\pm 0.32$ )           | 0.74( $\pm 0.01$ )  | 0.40( $\pm 0.01$ ) | 2.64( $\pm 0.05$ ) |

## S6. EQE Spectra and Stability Testing of PTB7:EH-IDTBR-Based OSCs

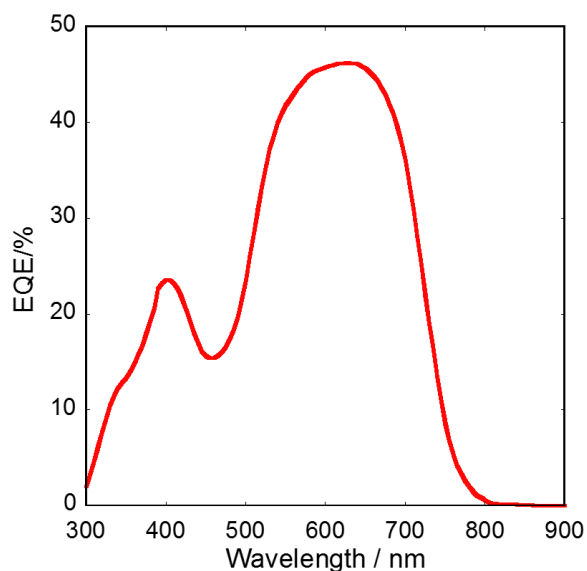

**Figure S6.** EQE spectra of PTB7:EH-IDTBR-based OSCs ( $D/(D + A) = 0.50$ ).

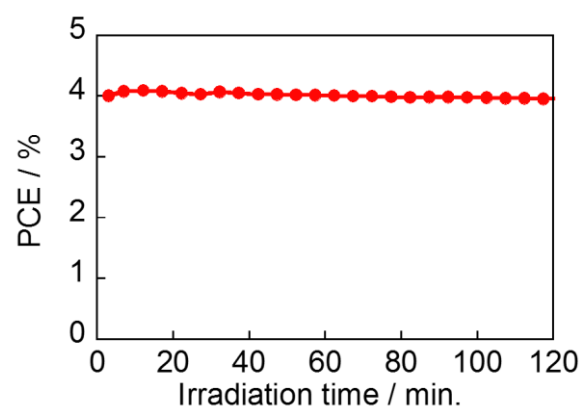

**Figure S7.** Changes of PCE of the OSC device based on PTB7:EH-IDTBR ( $D/(D + A) = 0.50$ ) under continuous photo-irradiation (AM1.5G,  $100 \text{ mWcm}^{-2}$ , ambient conditions, 120 min).
